# Supplementary material for: NiFeP nanosheets for efficient and durable hydrazine-assisted electrolytic hydrogen production
Source: Royal Society of Chemistry journal article supplement (doi:10.1039/d3dt04373h), 2024-01-01
Supplement: d3dt04373h1.pdf [file d3dt04373h1.pdf]

## supporting information

### **NiFeP nanosheets for efficient and durable Hydrazine-assisted electrolytic Hydrogen Production**

Jinxing Hou,<sup>a</sup> Kaifeng Mei,<sup>a</sup> Tongtong Jiang,<sup>a</sup> Xinxin Yu<sup>\*a</sup> and Mingzai Wu<sup>\*ab</sup>

<sup>a</sup> School of Materials Science and Engineering, Anhui University, Hefei Anhui 230601, P. R. China

<sup>b</sup> Institute of Energy, Hefei Comprehensive National Science Center, Hefei 230031, P. R. China

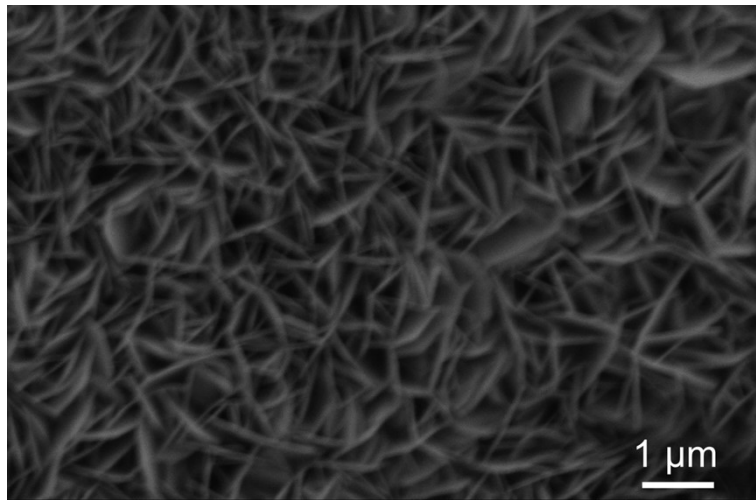

Figure S1. SEM of NiFe LDH/NF.

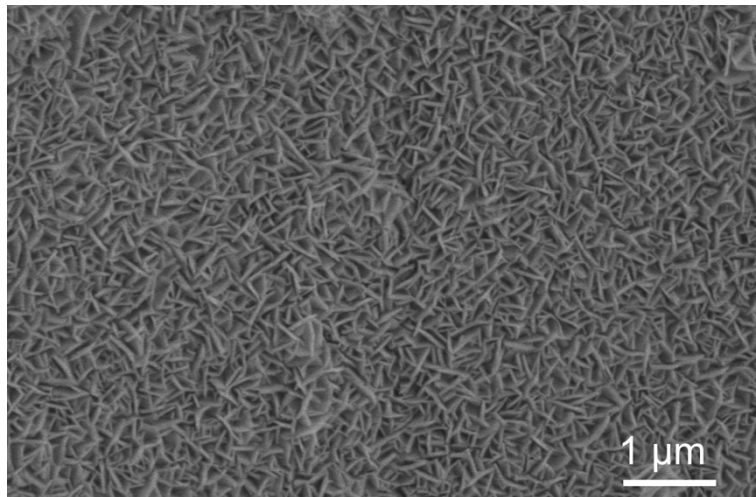

Figure S2. SEM of NiFeO/NF.

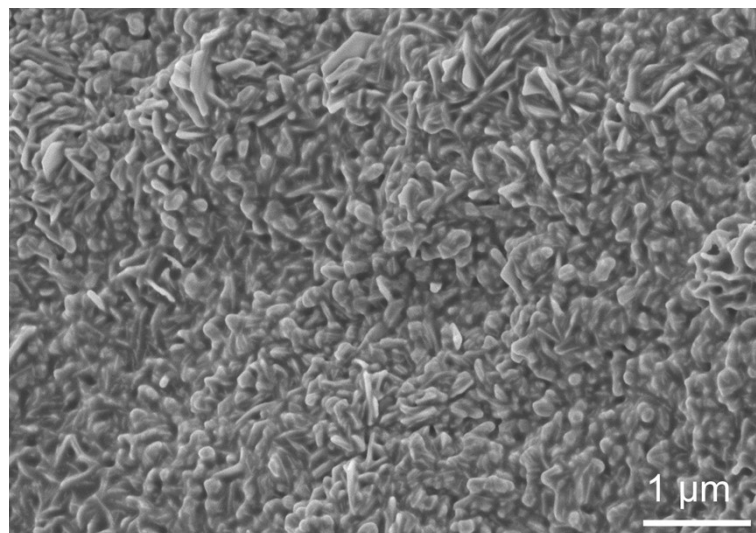

Figure S3. SEM of NiFeP/NF (synthesized with 2g  $\text{NaH}_2\text{PO}_2$ ).

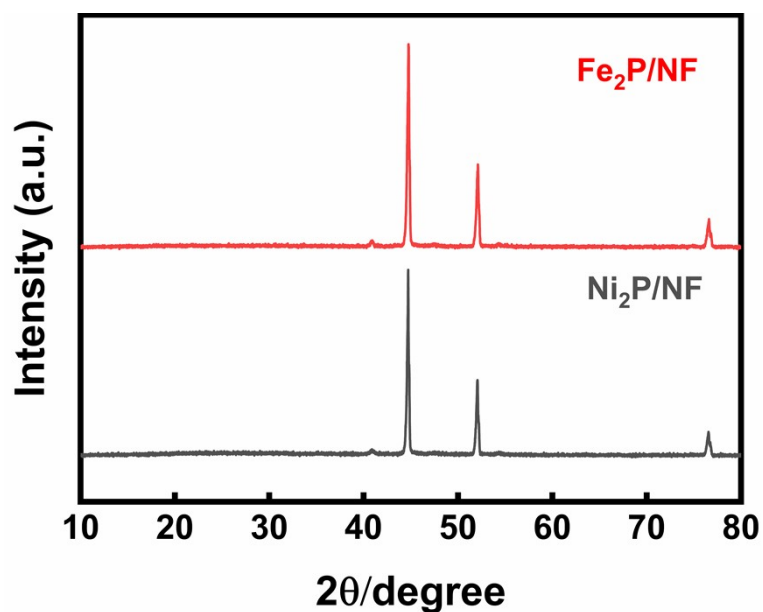

Figure S4. XRD of  $\text{Fe}_2\text{P}/\text{NF}$  and  $\text{Ni}_2\text{P}/\text{NF}$ .

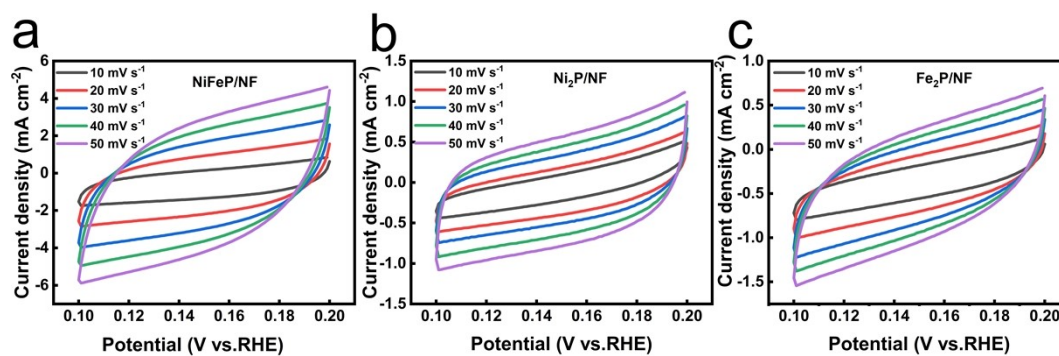

Figure S5. Cycle voltammetry curves of (a)  $\text{NiFeP}/\text{NF}$ , (b)  $\text{Ni}_2\text{P}/\text{NF}$  and (c)  $\text{Fe}_2\text{P}/\text{NF}$  in alkaline water.

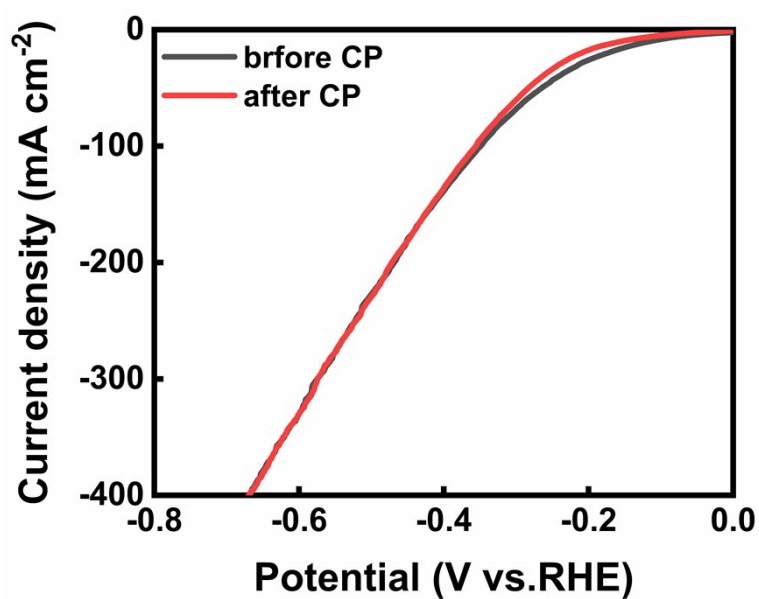

Figure S6. HER LSV of after CP test.

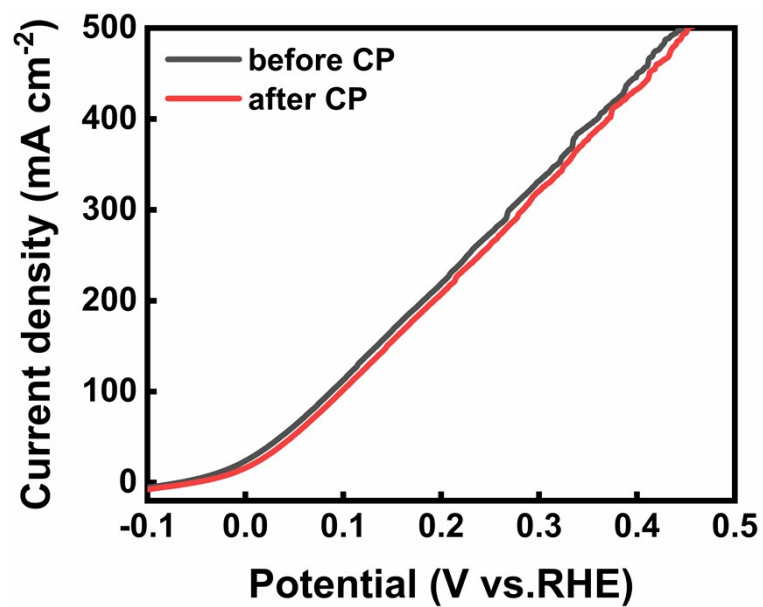

Figure S7. HzOR LSV of after CP test.

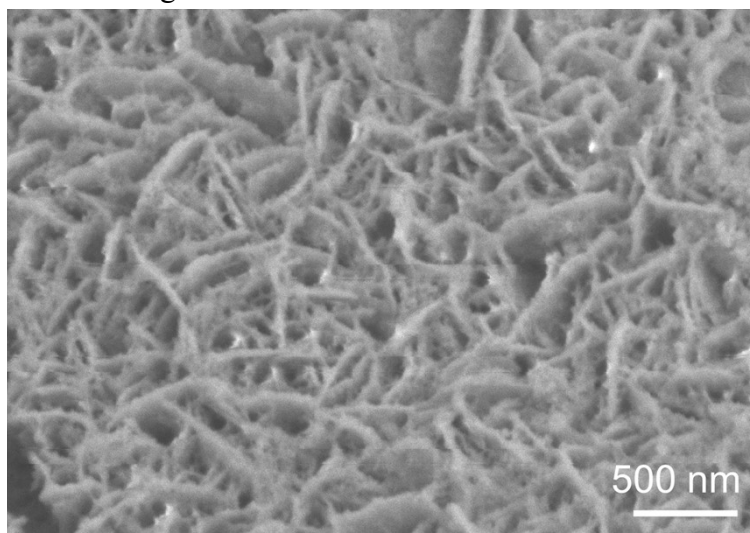

Figure S8. SEM of NiFeP/NF after HzOR.

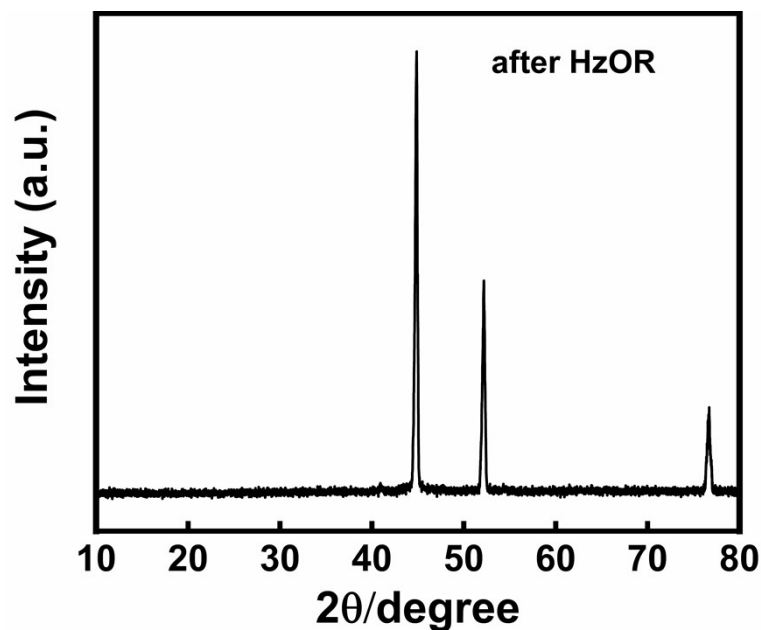

Figure S9. XRD of NiFeP/NF after HzOR.

**Table.S1.** Comparison of the overpotentials at 10 mA cm<sup>-2</sup> and 100 mA cm<sup>-2</sup> in 1 M KOH + 0.5 M N<sub>2</sub>H<sub>4</sub> with recently reported HzOR catalysts.

| Catalysts                                 | $\eta_{(10)}(\text{mV})$ | $\eta_{(100)}(\text{mV})$ | Reference |
|-------------------------------------------|--------------------------|---------------------------|-----------|
| NiFeP/NF                                  | -32                      | 90                        | This work |
| IrB NSs/NF                                | -15                      | 120                       | 1         |
| Co(OH) <sub>2</sub> /MoS <sub>2</sub> /CC |                          | 180                       | 2         |
| Ni-Co-Fe-P                                | 94                       |                           | 3         |
| ZIF67@CoNiSe-3                            | -10                      | 100                       | 4         |
| Cu <sub>1</sub> Ni <sub>2</sub> -N        | 0.5                      |                           | 5         |
| 0.2-NiSe/NF                               |                          | 350                       | 6         |
| Rh/Pd metallene                           | 7                        |                           | 7         |
| Co-FeNiSOH/NFF                            |                          | 355                       | 8         |
| Mn-CoS <sub>2</sub>                       | 77                       | 160                       | 9         |
| Co <sub>0.5</sub> NiS-NSs/NF              |                          | 340                       | 10        |

## Reference

1. Z. Duan, T. Ren, Y. Xu, Z. Wang, H. Yu, K. Deng, L. Wang and H. Wang, *Int. J. Hydrogen Energy.*, 2023, **48**, 37045-37052.
2. Y. Tong and X. Cheng, *ACS Sustainable Chem Eng.*, 2023, **11**, 3219-3277
3. G. B. Darband, M. Maleki, A. Toghraei and S. Shanmugam, *Int. J. Hydrogen Energy.*, 2023, **48**, 4253- 4263.
4. W. Liu, T. Shi and Z. Feng, *J Colloid Interf. Sci.*, 2023, **630**, 888-899.
5. Z. Wang, L. Xu, F. Huang, L. Qu, J. Li, K. A. Owusu, Z. Liu, Z. Lin, B. Xiang, X. Liu, K. Zhao, X. Liao, W. Yang, Y.-B. Cheng and L. Mai, *Adv. Energy. Mater.*, 2019, **9**, 1900390.
6. Y. Li, Y. Zhao, F.-M. Li, Z. Dang and P. Gao, *ACS Appl. Mater. Interfaces.*, 2021, **13**, 34457-34467.
7. Z. Wang, G. Yang, P. Tian, K. Deng, H. Yu, Y. Xu, X. Li, H. Wang and L. Wang, *J. Mater. Chem. A.*, 2023, **11**, 10222-10227.
8. X. Ren, Y. Tong, *Int. J. Hydrogen Energy.*, 2024, **49**, 489-497.
9. J. Hou, X. Peng, J. Sun, S. Zhang, Q. Liu, X. Wang, J. Luo and X. Liu, *Inorg. Chem. Front.*, 2022, **9**, 3047-3058.
10. X.-H. Wang, R. Yuan, S.-B. Yin, Q.-L. Hong, Q.-G. Zhai, Y.-C. Jiang, Y. Chen and S.-N. Li, *Adv. Funct. Mater.*, 2023, 2310288.
